# Supplementary material for: USP1 deubiquitinase maintains phosphorylated CHK1 by limiting its DDB1-dependent degradation
Source: PubMed Central journal article supplement — Hum Mol Genet. 2011 Mar 9;20(11):2171–81. doi: 10.1093/hmg/ddr103 (PMC3090195; doi:10.1093/hmg/ddr103), 2011-03-09
Supplement: supp_ddr103_ddr103supp.pdf [file supp_ddr103_ddr103supp.pdf]

**USP1 deubiquitinase maintains phosphorylated CHK1 by limiting its DDB1-dependent degradation.**

Jean-Hugues Guervilly\*, Emilie Renaud, Minoru Takata and Filippo Rosselli

**Supplementary Figure legend**

**Figure S1.**

**(A) USP1 depletion affects exogenous CHK1 protein levels.** U2OS cells were first transfected with siRNAs. The following day, they were transfected with a plasmid encoding FLAG-CHK1 or 2S/A mutant FLAG-CHK1. Western blots were performed using anti-CHK1 and anti-actin antibodies.

**(B) USP1 depletion restrains CHK1 levels and phosphorylation following UV exposure in a FANCA-dependent manner.** HeLa cells were transfected with siRNAs, treated with UVC (10 J/m<sup>2</sup>) and lysed 3 h later to analyse FANCD2 monoubiquitylation and CHK1 phosphorylation. Western blots were performed with the indicated antibodies.

**(C) CHK2 levels are higher in HeLa cells compared to U2OS cells.** HeLa and U2OS cells were transfected with siRNAs, and cellular extracts were analysed 72 h later. Western blots were performed using anti-CHK1 and anti-actin antibodies. Red Ponceau staining of the membrane is presented to show protein loading.

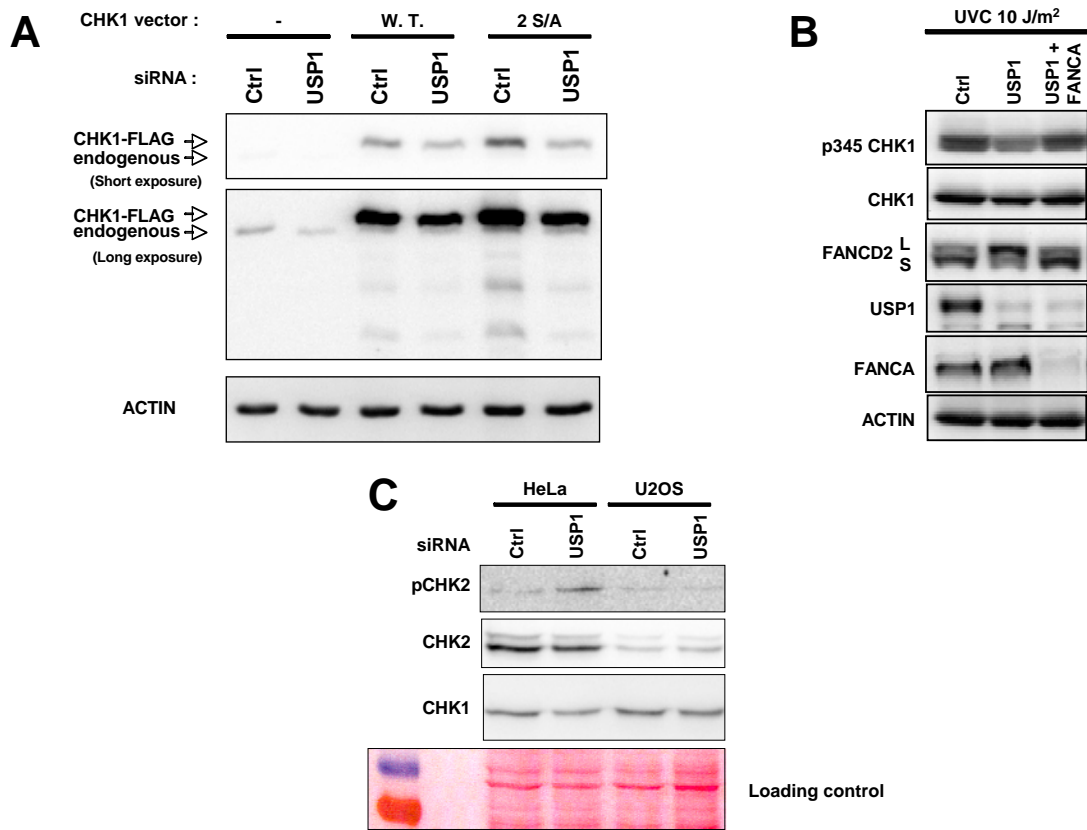

Supplemental Figure 1 - Guervilly et al.
